# Supplementary material
Source: PubMed Central journal article supplement (PMC3246241)
Supplement: ismej201185x1.pdf [file ismej201185x1.pdf]

# Belda-Ferre et al. Supplementary Fig 1

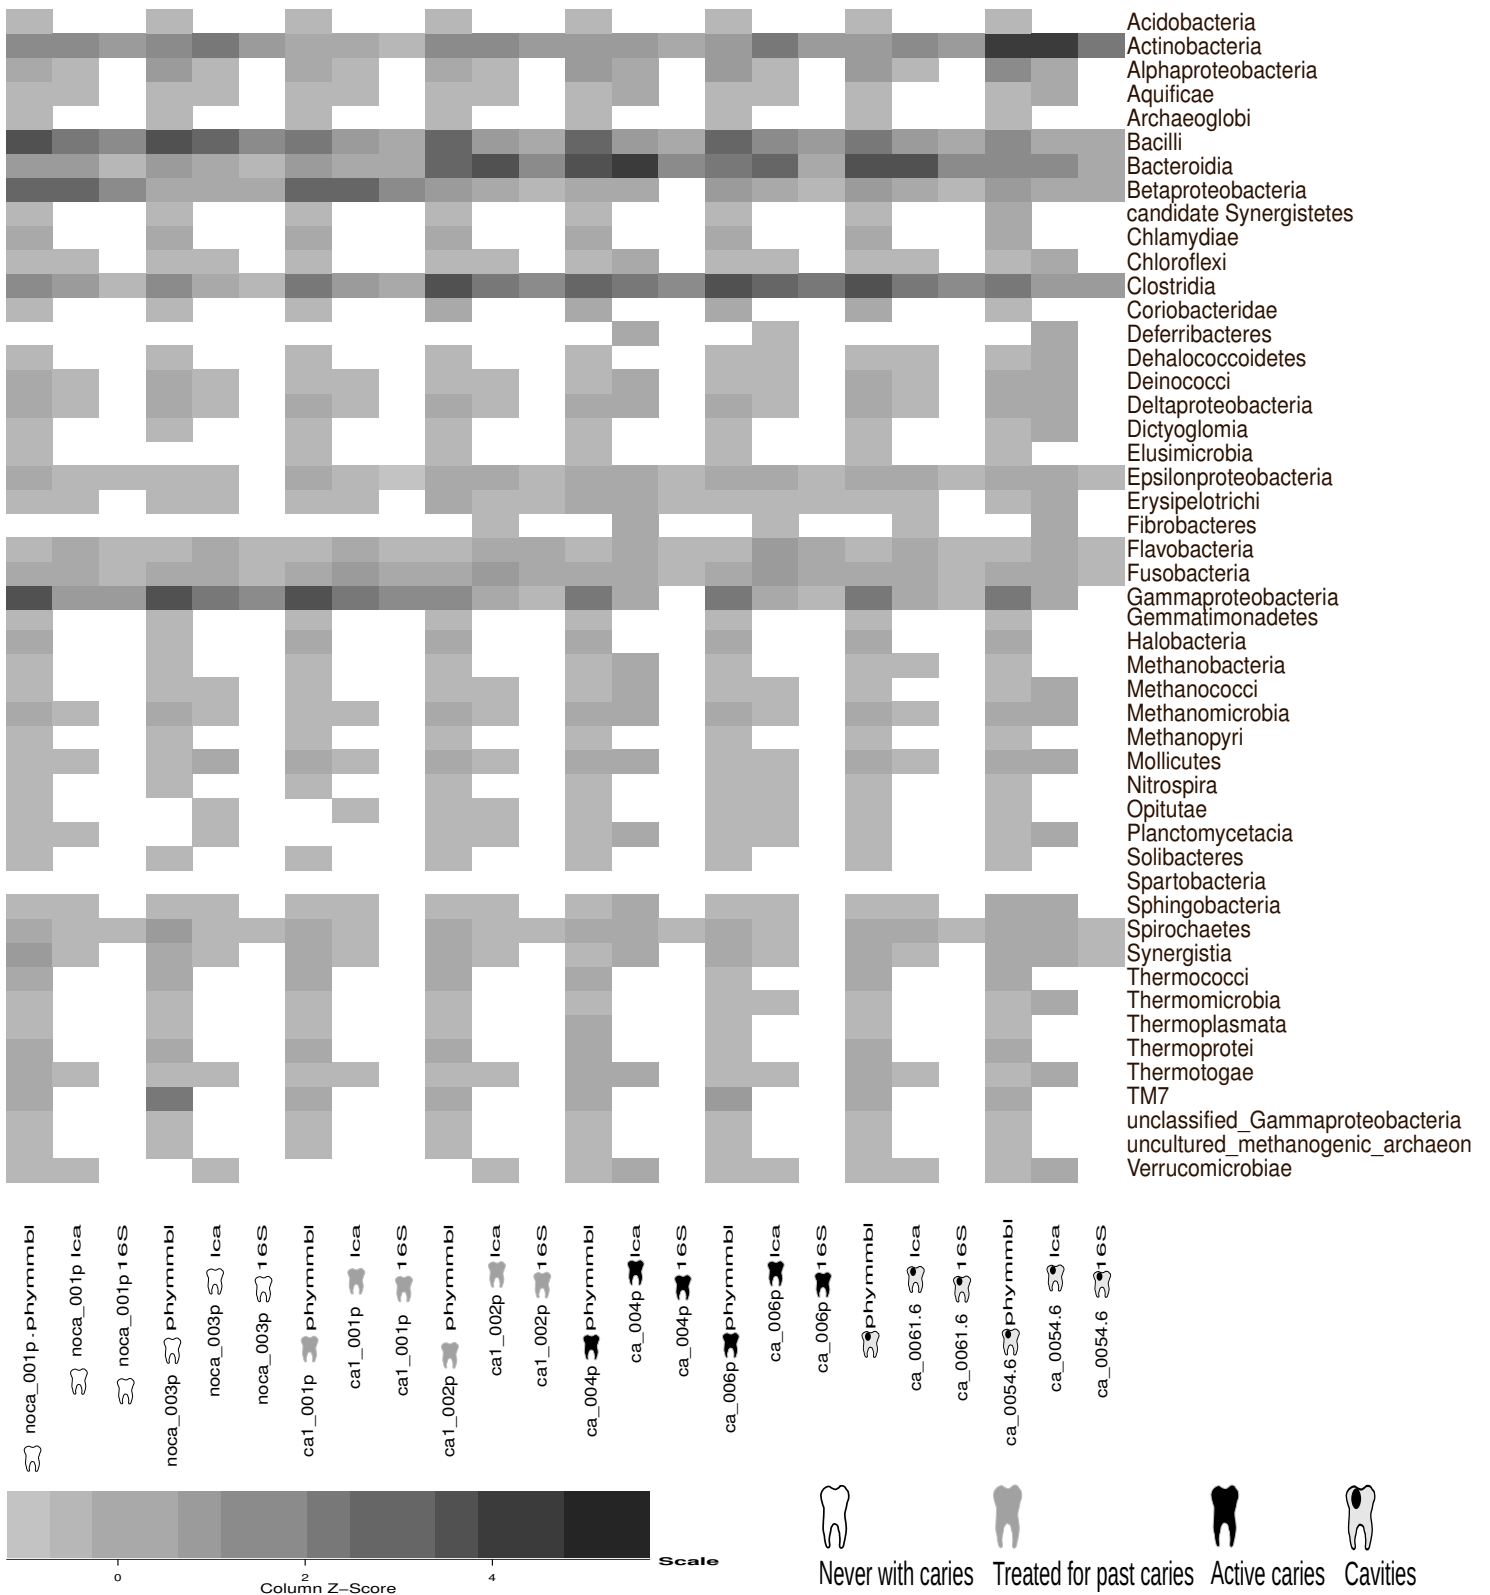

**Supplementary Fig 1 | Bacterial diversity in the metagenome of the oral cavity by 16S rRNA, LCA and phymmBL approaches.** Similar results are obtained for the most common microbial groups, but 16S rRNA reads detect a smaller fraction of taxa.

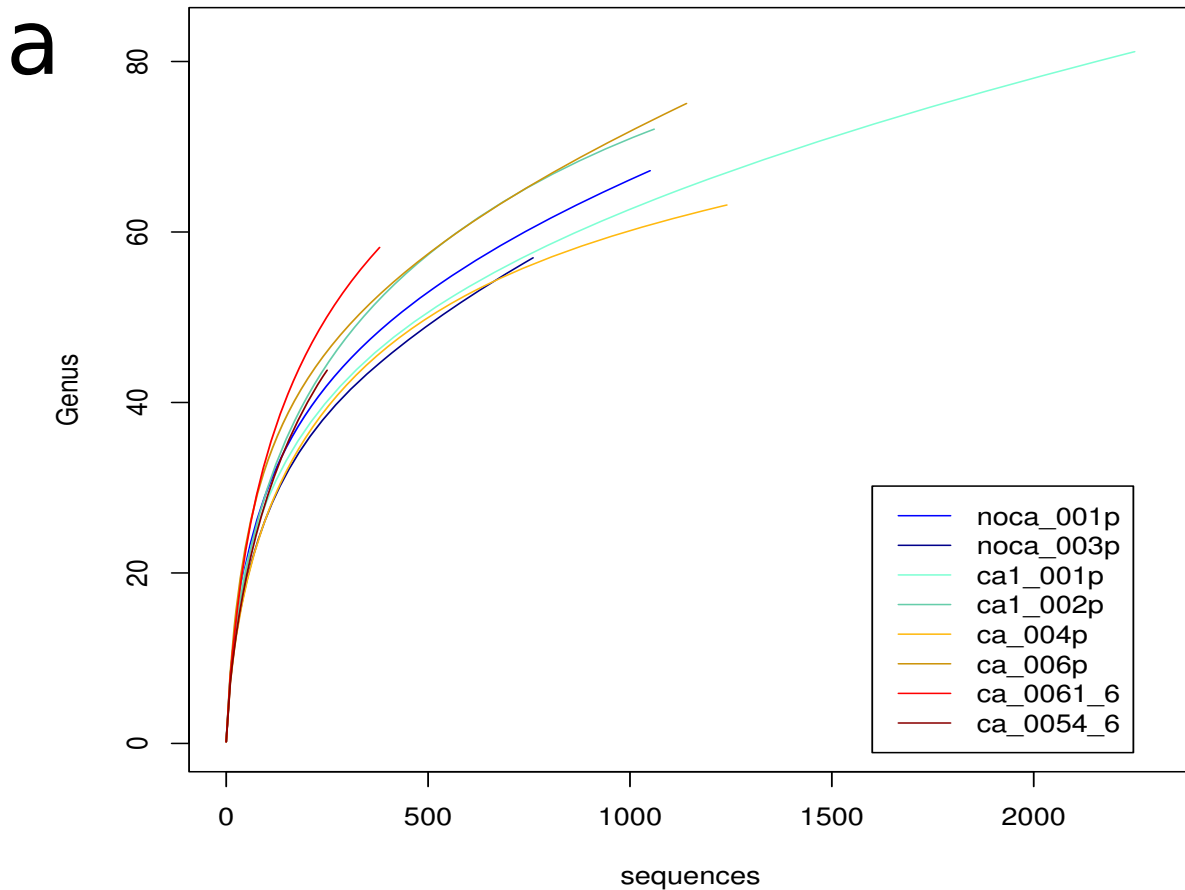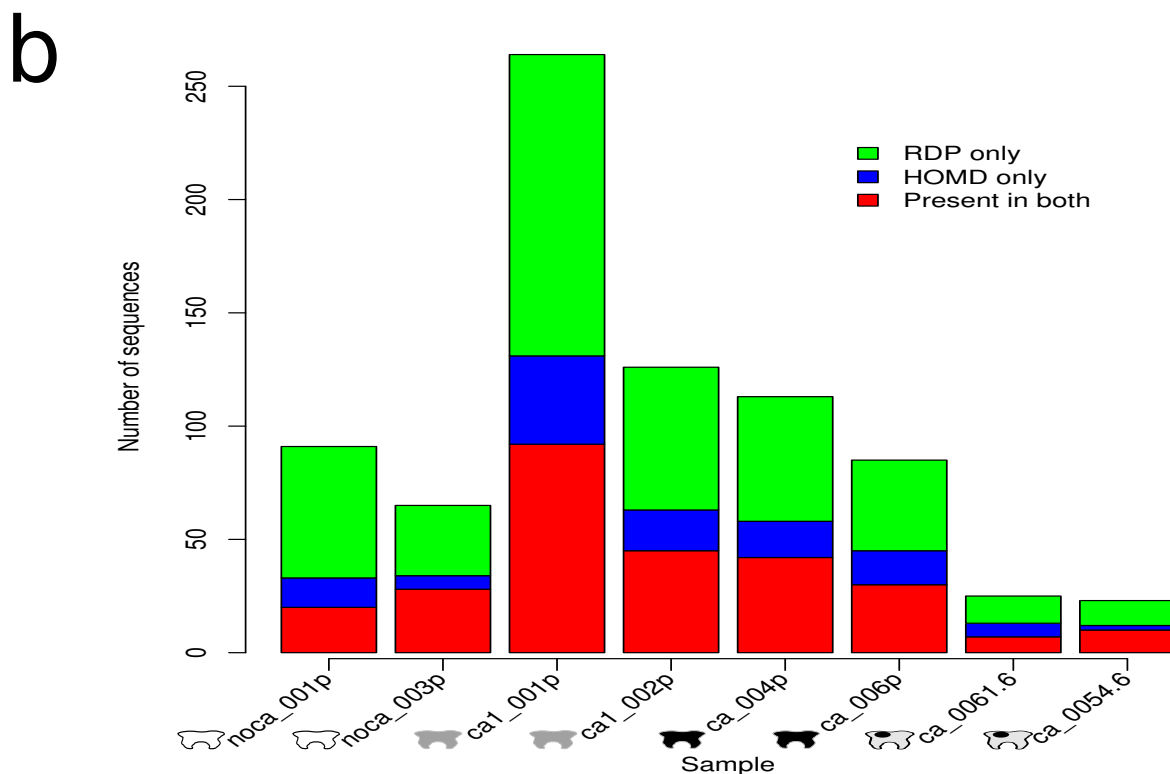

**Supplementary Figure 2.** (a) Rarefaction curves for the 8 metagenomic samples studied. Curves were estimated based on the 16S rRNA reads extracted from the metagenomes. No clear differences in diversity are observed between the health status of the samples. (b) New Operational Taxonomic Units (OTUs) in the oral cavity. Sequences corresponding to 16S rRNA genes were BLASTed against the Ribosomal Database Project (RDP) and the Human Oral Microbiome Database (HOMD) using reads which were over 400 bp and which aligned over 90% of the length. A read was considered to represent a new OTU if the sequence identity against its top hit was between 80-95%. The graphs show the number of new OTUs with hits in the RDP, the HOMD or both. A complete list is available from the authors upon request.

# Belda-Ferre et al. Supplementary Fig.3

a

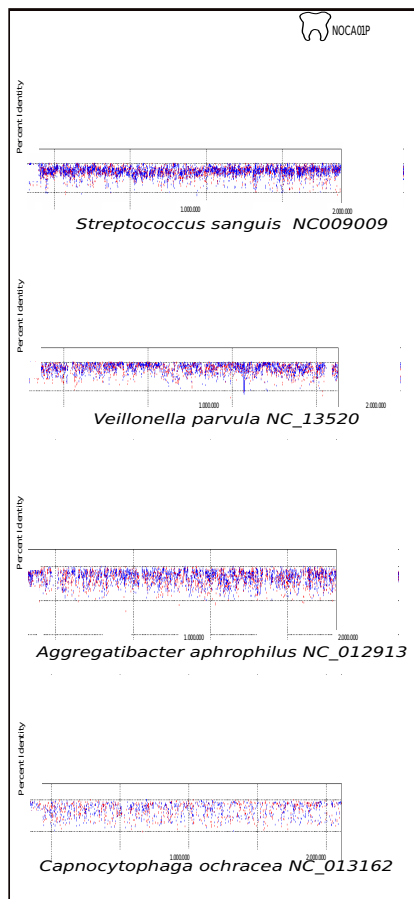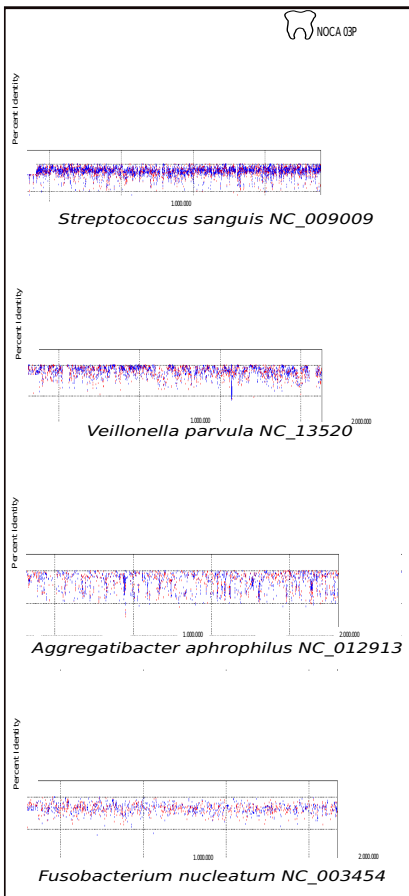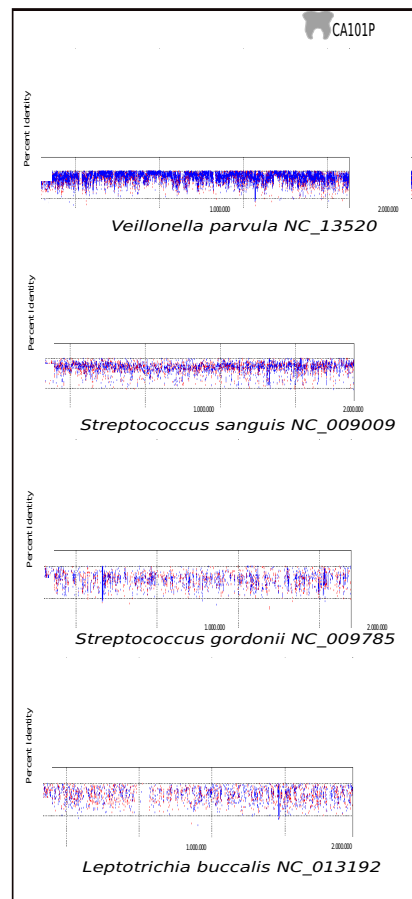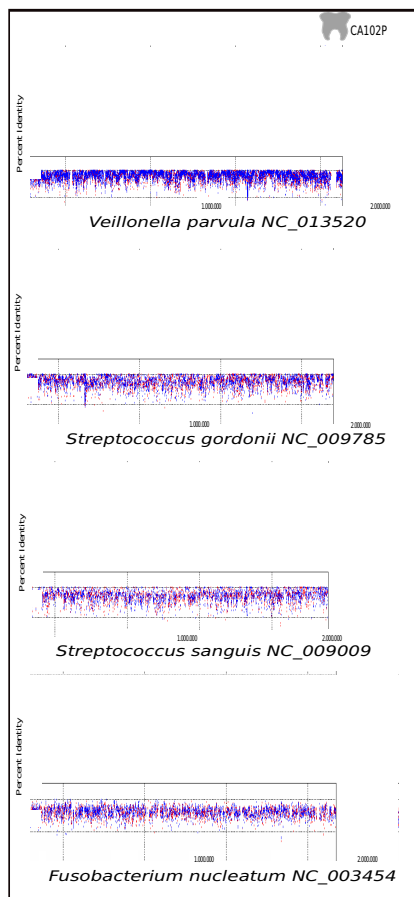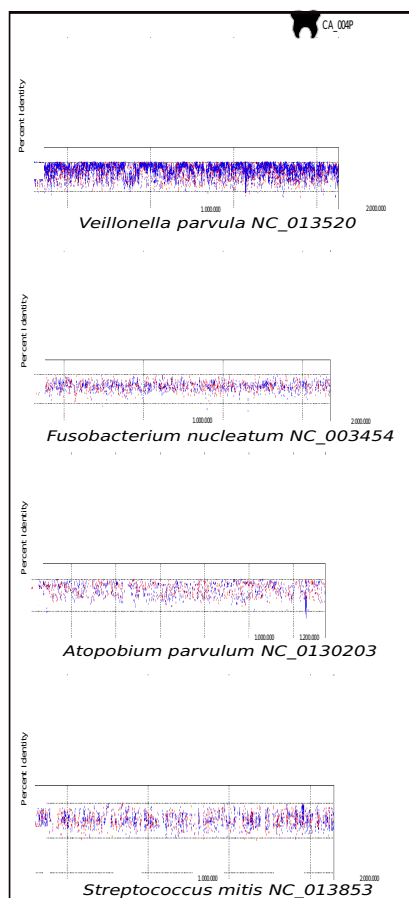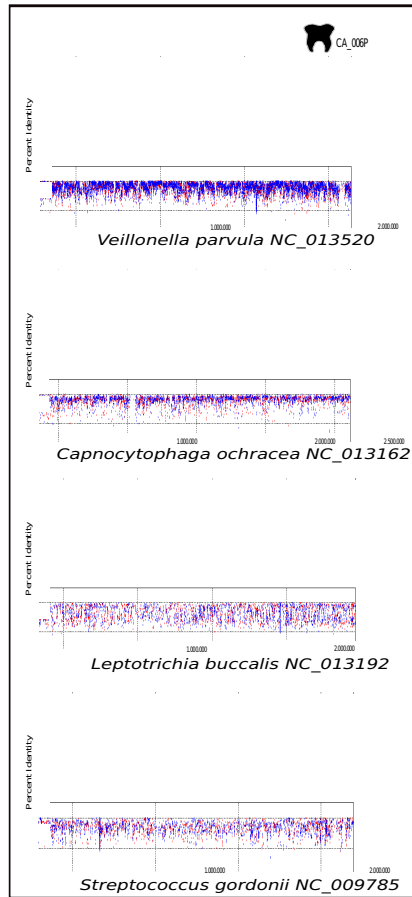



CA1\_02P

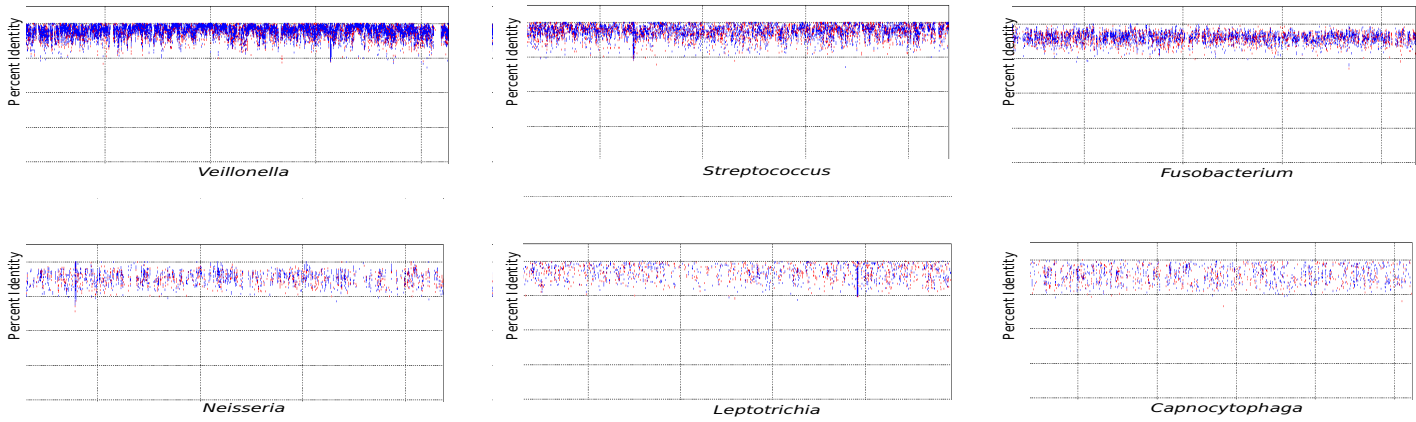

CA\_04P

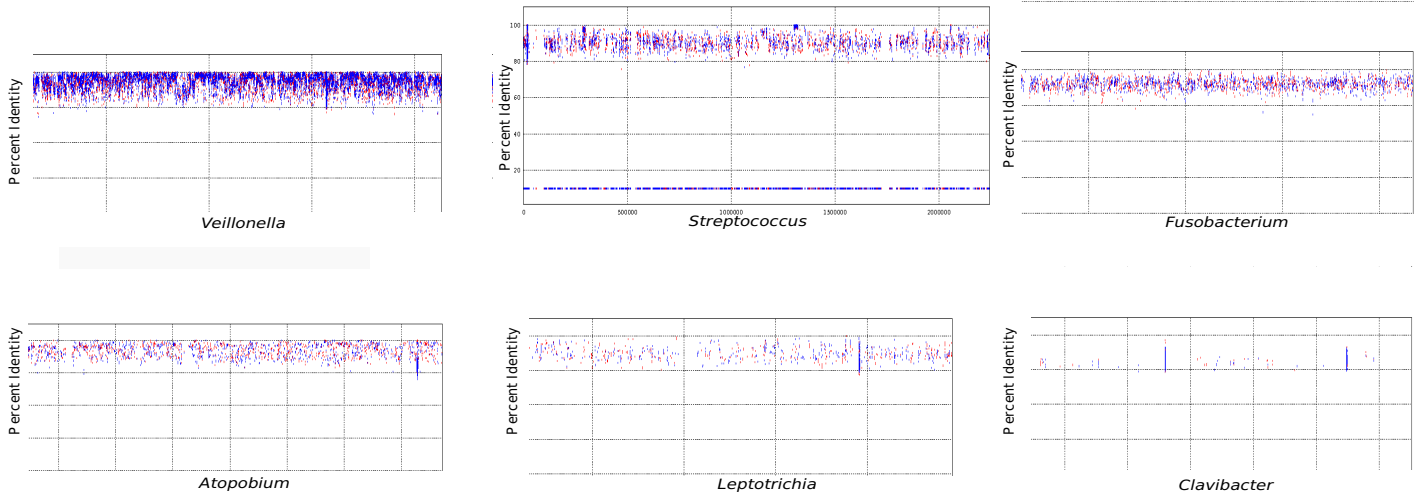

CA\_06P

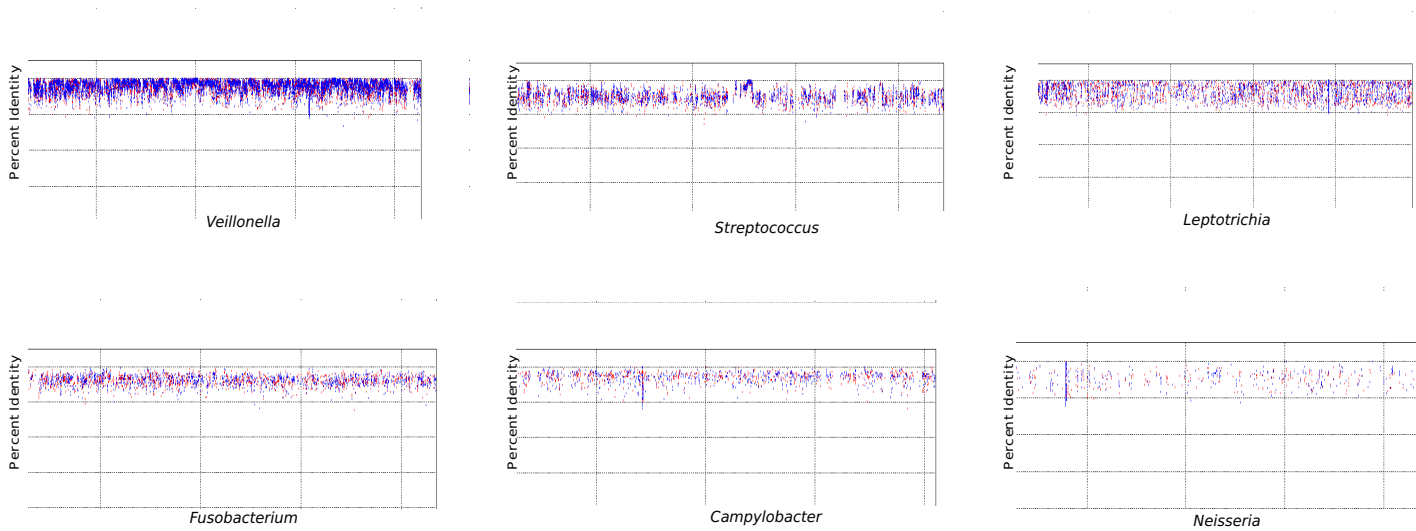

**Supplementary Fig. 3** | Metagenomic recruitment of the 4 most common species per sample (a), and the 6 most common genera (b) against six metagenomes corresponding to supragingival dental plaque samples. A species was assumed to be present in the metagenome if the mode of the frequency distribution of percent identity was above 94%, following Konstantinidis and Tiedje . A genus was assumed to be present in the metagenome if the mode of the frequency distribution of percent identity was above 90%. For genera recruitment plots, the graph corresponding to the most common species for each genus was selected as a representative

# Belda-Ferre *et al.* Supplementary Fig 4

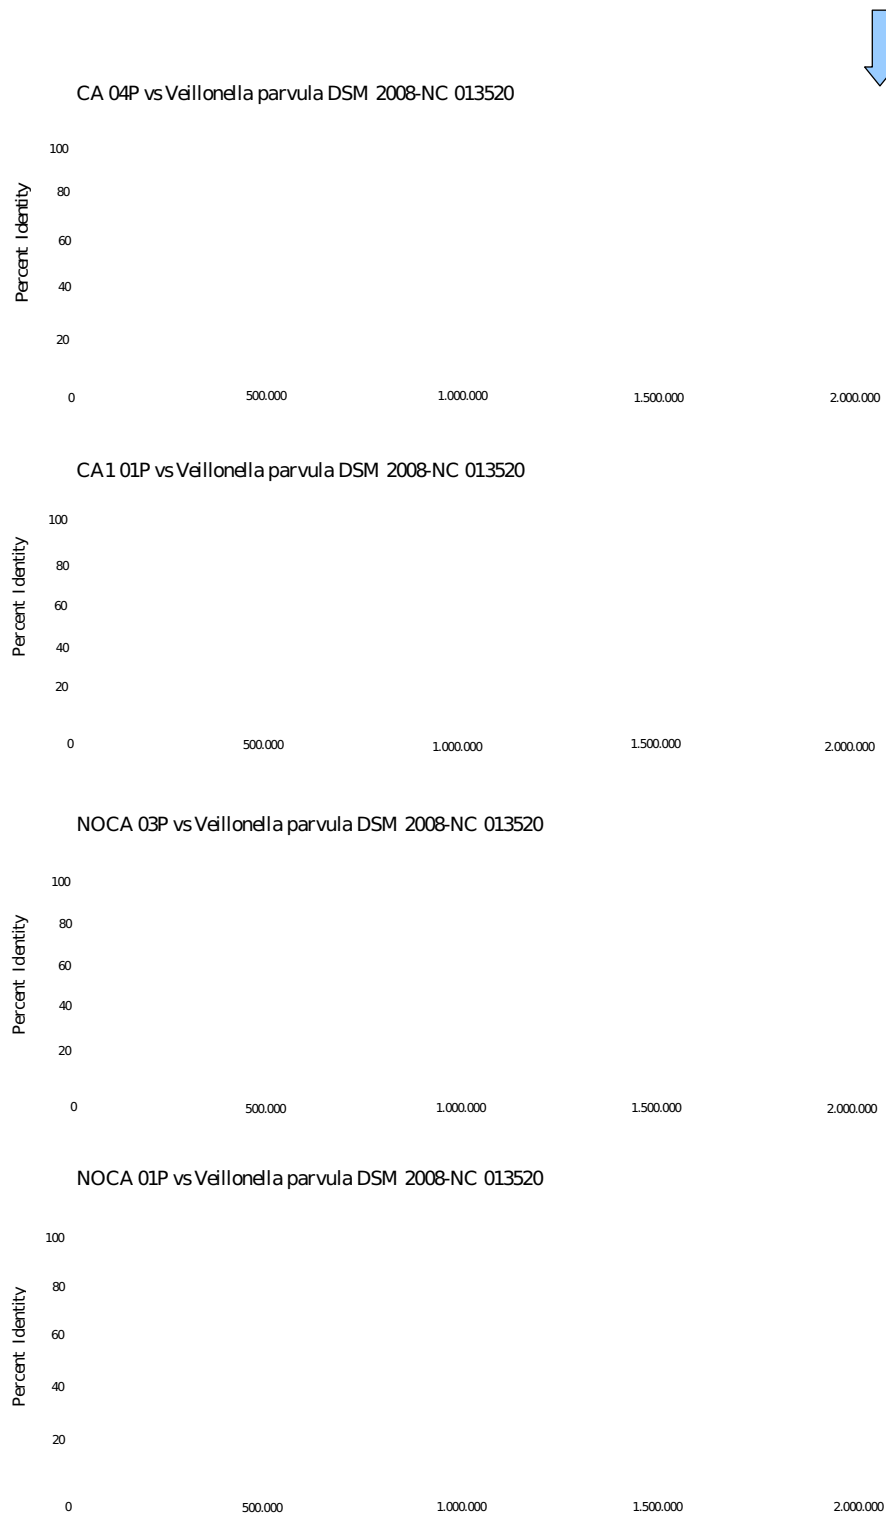

**Supplementary Fig. 4** | Metagenomic recruitment of the species *Veillonella parvula* at the protein level in four supragingival dental plaque samples from the oral microbiome. Plots were done using Promer (see supplementary methods). The arrow indicates a genomic island that is absent in the two individuals without caries, showing differences in gene content between strains of this species inhabiting different individuals. Genes in the island were still present in samples CA\_04P and CA1\_01P under lower levels of coverage equivalent to those of samples NOCA\_01P and NOCA\_03P.

Belda-Ferre *et al.* Supplementary Fig 5

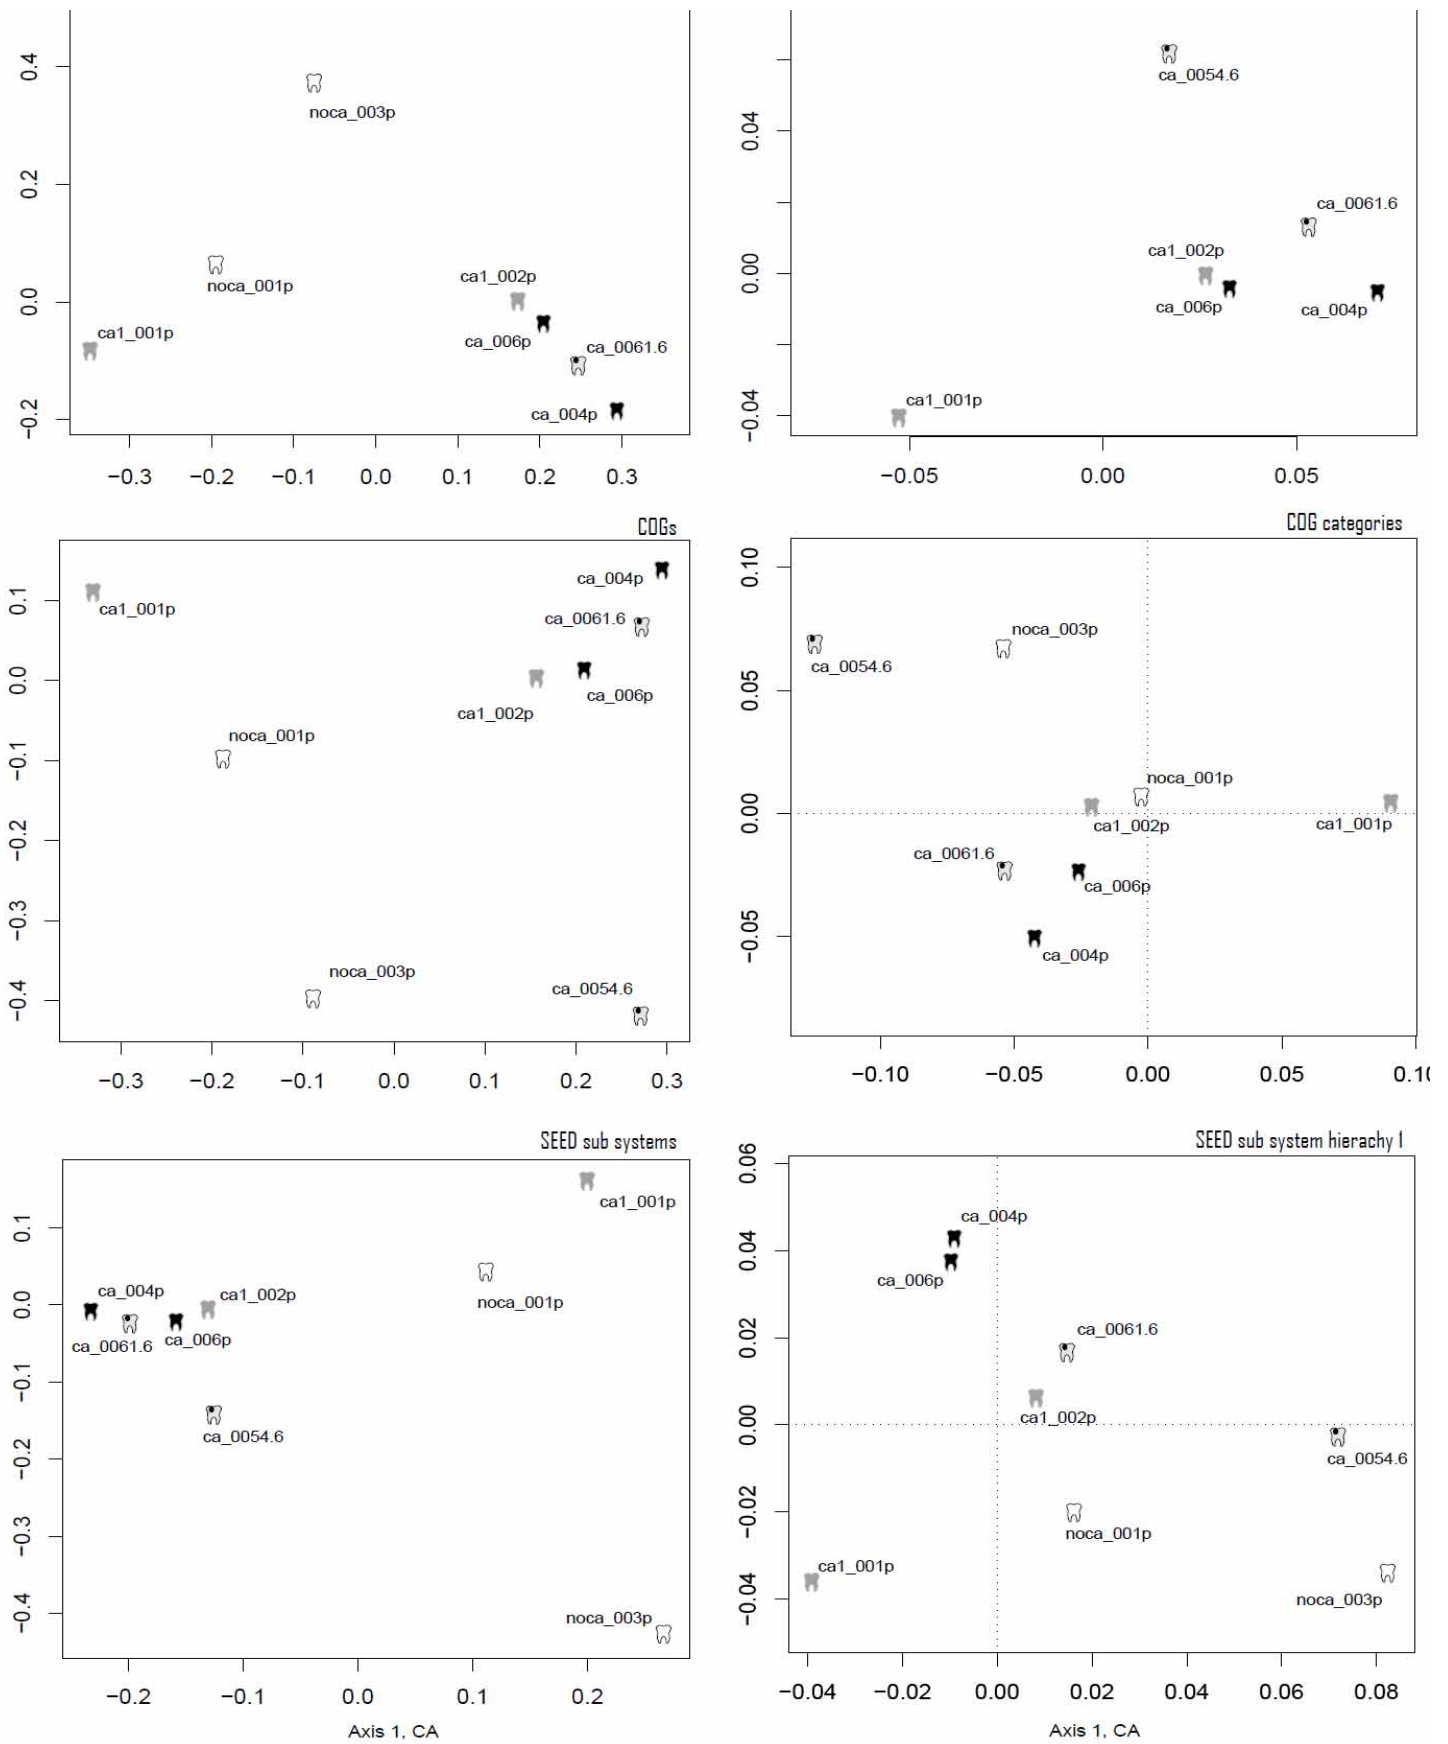

**Supplementary Fig. 5** | Correspondence Analyses (CoAs) of the functional annotation of oral samples. This figure depicts the plot of the first 2 axes of a CoA performed on a table of frequencies of functional classes per sample. Six independent analyses were done over different annotations systems: TigrFam, COG and SEED Subsystems in the right column; and their respective integration into higher hierarchies in the left column: TigrFam main roles, COG categories, and Subsystem Hierarchy 1. Similar clustering of the samples were obtained with the different methods

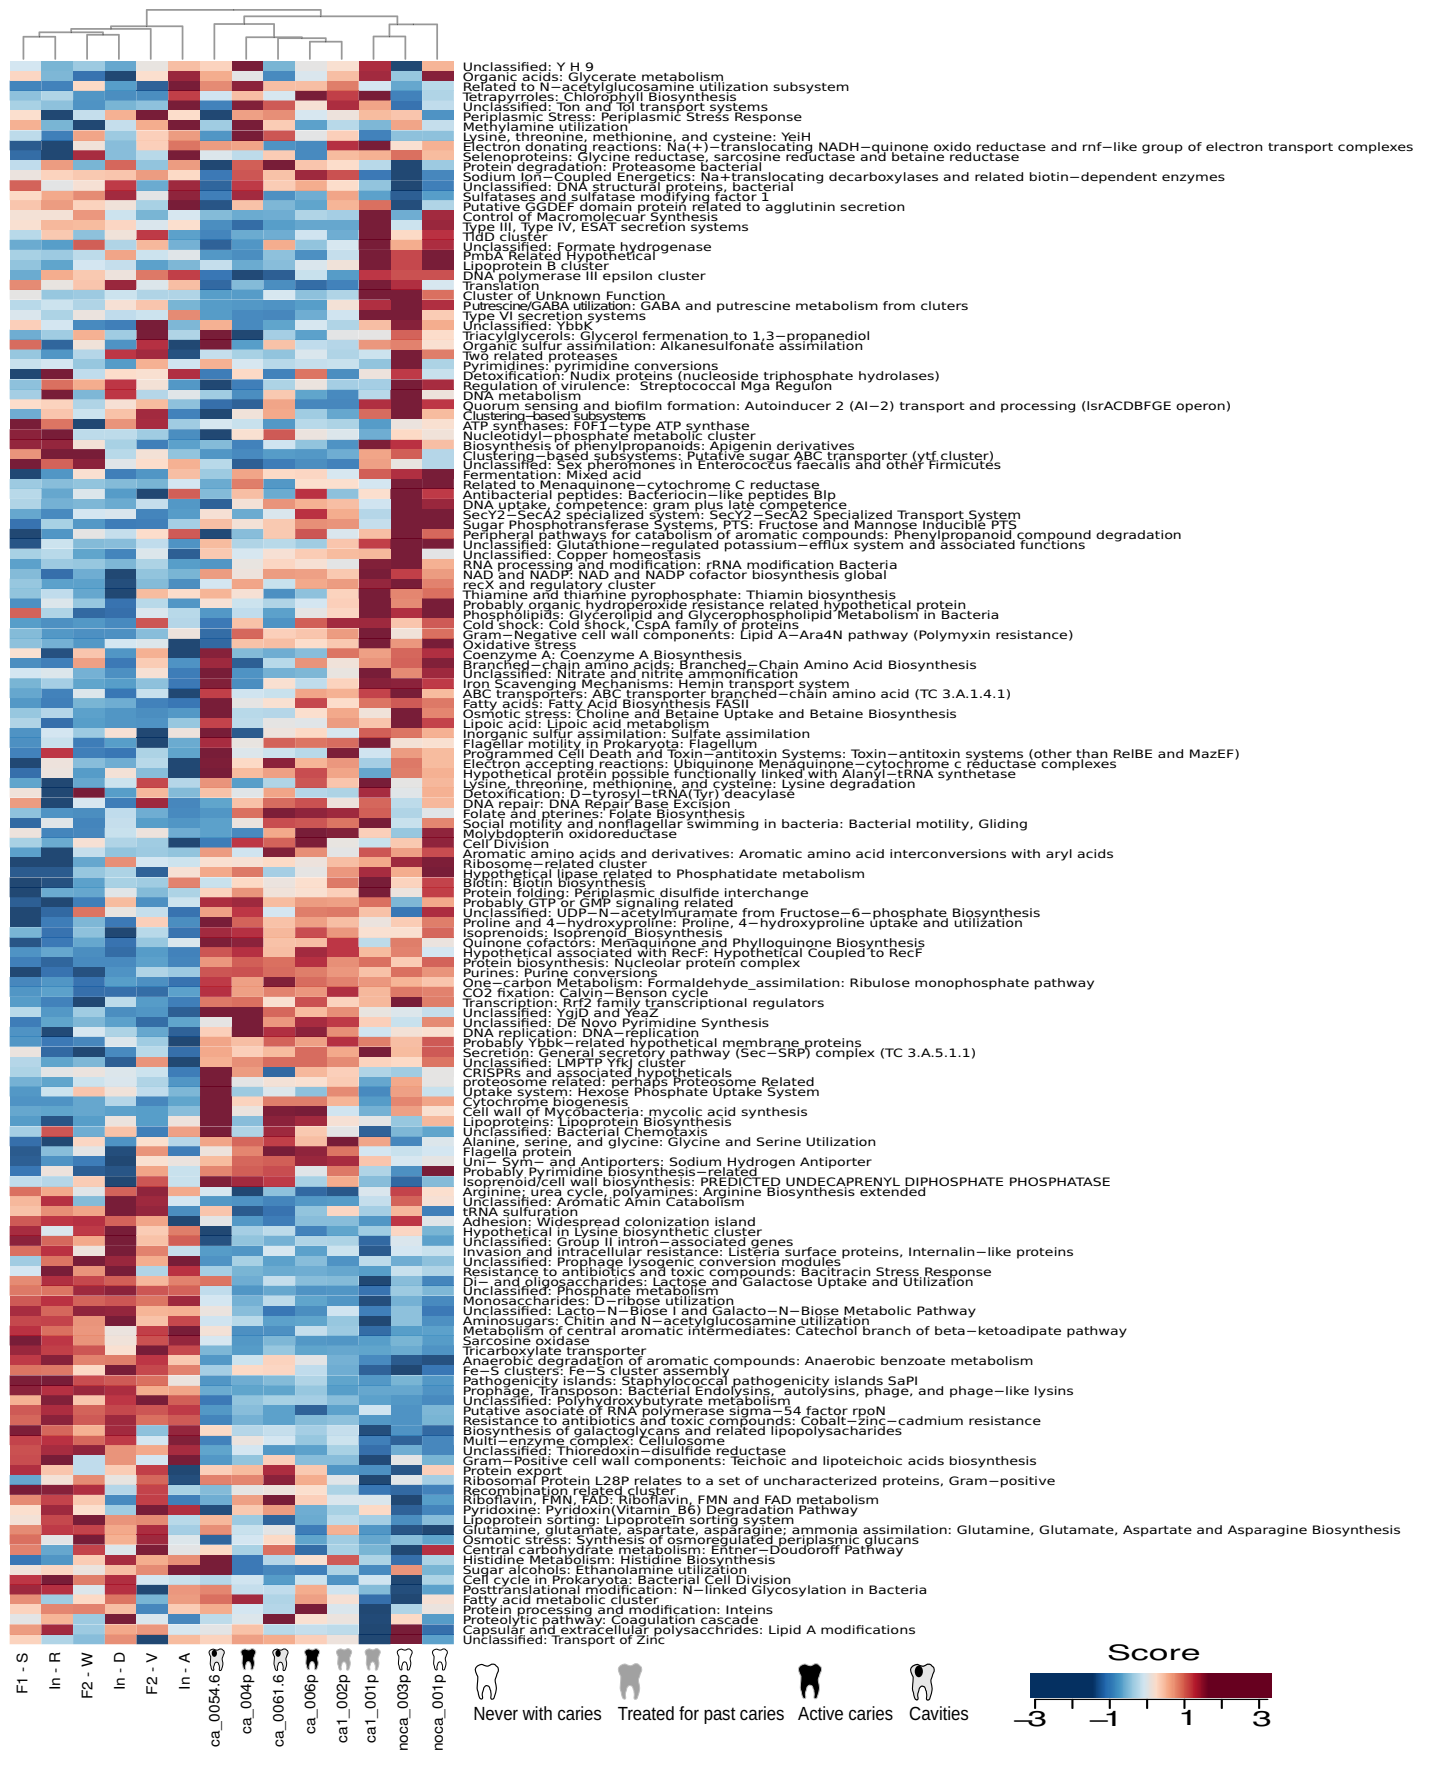

**Supplementary Fig. 6 | Functional profiles from oral and gut metagenomic samples.** Classification was based on SEED Subsystem Hierarchy 2. Counts were first normalized to the total number of reads per sample and then normalized by function. Blue to red gradient indicates levels of under/ over-representation. Large blocks of gene categories are over-represented in each of the two microbiotas, indicating that the gut and the oral cavity are two functionally distinct ecosystems. Within the oral samples, some categories are over-represented in individuals without dental caries.



**Supplementary Table 1. Features of oral samples and their metagenomes.**

| Age | Sex  | Sample <sup>1</sup> | CAO's Index <sup>2</sup> | Number of reads | % Replic <sup>3</sup> | % DNA |        | Total Mbp | Contigs >5kbp | Largest contig | N50 Contig Size | 16S reads <sup>4</sup> | Simpson Index <sup>5</sup> | Shannon Index <sup>5</sup> | Chao1 Index <sup>6</sup> | ACE Index <sup>7</sup> |
|-----|------|---------------------|--------------------------|-----------------|-----------------------|-------|--------|-----------|---------------|----------------|-----------------|------------------------|----------------------------|----------------------------|--------------------------|------------------------|
|     |      |                     |                          |                 |                       | Human | %      |           |               |                |                 |                        |                            |                            |                          |                        |
| 23  | Male | NOCA_01P            | 0                        | 347927          | 1.2                   | 40.59 | 77.54  | 13        | 12856         | 898            | 543             | 0.93                   | 3.19                       | 100 ± 24.6                 | 94.6 ± 4.9               |                        |
| 39  | Male | NOCA_03P            | 0                        | 330073          | 3.95                  | 22.76 | 100.13 | 49        | 43857         | 1083           | 374             | 0.91                   | 2.94                       | 92 ± 28.4                  | 83.7 ± 4.8               |                        |
| 36  | Male | CA1_01P             | 8 (1)                    | 494659          | 3.93                  | 2.23  | 203.71 | 657       | 46856         | 2230           | 1160            | 0.94                   | 3.21                       | 120 ± 24.8                 | 120.4 ± 5.8              |                        |
| 29  | Male | CA1_02P             | 6 (4)                    | 315892          | 3.95                  | 2.74  | 129.85 | 154       | 15919         | 1071           | 575             | 0.92                   | 3.11                       | 85.2 ± 9                   | 89.9 ± 4.7               |                        |
| 36  | Fem  | CA_04P              | 25 (15)                  | 402049          | 4.54                  | 11.54 | 142.37 | 181       | 19835         | 939            | 663             | 0.89                   | 2.89                       | 74.4 ± 9.9                 | 73.5 ± 4.2               |                        |
| 49  | Male | CA_06P              | 11 (8)                   | 354192          | 2.88                  | 10.83 | 123.27 | 47        | 51033         | 872            | 615             | 0.95                   | 3.38                       | 129.2 ± 41                 | 115.9 ± 5.8              |                        |
| 49  | Male | CA_06_1.6           | 11 (8)                   | 305820          | 3.25                  | 66.97 | 37.52  | 0         | 3376          | 667            | 194             | 0.92                   | 3.21                       | 77 ± 13.3                  | 77.1 ± 4.3               |                        |
| 42  | Male | CA_05_4.6           | 10 (7)                   | 291162          | 3.19                  | 74.99 | 27.67  | 2         | 29784         | 661            | 130             | 0.88                   | 2.82                       | 55.3 ± 8.3                 | 66.3 ± 4.6               |                        |

<sup>1</sup> Samples marked with “P” indicate supragingival dental plaque samples. Samples with a number code indicate the tooth from which the cavity sample was taken, following the international WHO nomenclature

<sup>2</sup> Number of caried, absent and obstructed teeth (wisdom teeth were excluded). Number between brackets indicate the number of exposed caries

<sup>3</sup> Proportion of filtered artificial replicates during pyrosequencing

<sup>4</sup> Number of 16S rRNA sequences detected in the metagenome and assigned by the RDP classifier.

<sup>5</sup> Diversity indexes were calculated at the genus level based on 16S rRNA sequences extracted from the metagenomes

<sup>6</sup> Data indicate Chao1 richness index (number of expected genera in the sample) and its corresponding standard errors

<sup>7</sup> Data indicate ACE richness index (number of expected genera in the sample) and its corresponding standard errors

**Supplementary Table 2. Level of functional assignment of the metagenomic sequences.**

| ID        | Health status                                                                     | Total reads | cd (n) <sup>a</sup> | cd (%) | cog (n) <sup>b</sup> | cog (%) | Tfam (n) <sup>c</sup> | Tfam (%) | seed (n) <sup>d</sup> | seed(%) |
|-----------|-----------------------------------------------------------------------------------|-------------|---------------------|--------|----------------------|---------|-----------------------|----------|-----------------------|---------|
| NOCA_01P  |  | 204218      | 126729              | 62     | 108929               | 53      | 82457                 | 40       | 111497                | 50      |
| NOCA_03P  |  | 244881      | 116575              | 48     | 95327                | 39      | 74356                 | 30       | 93391                 | 38      |
| CA1_01P   |  | 464594      | 321997              | 69     | 280652               | 60      | 214050                | 46       | 271868                | 59      |
| CA1_02P   |  | 295072      | 182091              | 62     | 150966               | 51      | 118716                | 40       | 146161                | 55      |
| CA_04P    |  | 339503      | 192003              | 57     | 161384               | 48      | 126281                | 37       | 158887                | 48      |
| CA_06P    |  | 306740      | 182349              | 59     | 151524               | 49      | 119477                | 39       | 146032                | 47      |
| CA_05_4.6 |  | 70503       | 40999               | 58     | 31864                | 45      | 26245                 | 37       | 29625                 | 42      |
| CA_06_1.6 |  | 97722       | 54305               | 56     | 45440                | 46      | 35395                 | 36       | 44552                 | 46      |

(n):  
absolute  
count  
(%):  
percenta  
ge of  
the total  
reads in  
sample  
<sup>a</sup>cdd :  
conserv  
ed  
domains

<sup>a</sup> of NCBI Conserved Domains Database

<sup>b</sup>cog: cluster of orthologous groups

<sup>c</sup>Tfam: Tigr Fams

<sup>d</sup>seed : Seed / MG-RAST sub systems

**Supplementary Table 3 | Potential new Operational Taxonomic Units (OTUs) in the oral cavity.** Sequences corresponding to 16S rRNA genes were extracted from the 8 metagenomes. BLASTN was performed against the Ribosomal Database Project and the Human Oral Microbiome Database (HOMD) using reads which were over 400 bp and which aligned over 90% of the length. Only OTUs with hits between 80-95% nucleotide identity were considered.

| <b>CLOSEST SPECIES</b>                                   | <b>Number of Reads</b> | <b>%ID</b>  |
|----------------------------------------------------------|------------------------|-------------|
| uncultured bacterium                                     | 71                     | 0.808-0.946 |
| <i>Acetobacter pasteurianus</i> IFO 3283-01-42C          | 61                     | 0.801-0.886 |
| <i>Streptococcus pyogenes</i> MGAS10750                  | 33                     | 0.812-0.949 |
| <i>Mycoplasma arthritidis</i> 158L3-1                    | 23                     | 0.801-0.864 |
| <i>Lactococcus lactis</i>                                | 20                     | 0.801-0.945 |
| <i>Helicobacter mustelae</i> 12198                       | 18                     | 0.802-0.86  |
| <i>Bacteroides vulgatus</i>                              | 17                     | 0.803-0.898 |
| <i>Dickeya chrysanthemi</i>                              | 17                     | 0.828-0.932 |
| <i>Actinobacillus pleuropneumoniae</i> L20               | 16                     | 0.808-0.929 |
| <i>Neisseria meningitidis</i> 8013                       | 16                     | 0.808-0.943 |
| <i>Dechloromonas</i> sp. HZ                              | 16                     | 0.812-0.896 |
| <i>Streptococcus</i> sp.                                 | 15                     | 0.805-0.949 |
| <i>Prevotella</i> sp.                                    | 12                     | 0.883-0.947 |
| <i>Francisella noatunensis</i> subsp. <i>noatunensis</i> | 12                     | 0.803-0.915 |
| <i>Bacteroides helcogenes</i>                            | 12                     | 0.832-0.935 |
| <i>Kinetoplastibacterium blastocrithidii</i>             | 11                     | 0.840-0.939 |
| <i>Veillonella parvula</i> DSM 2008                      | 11                     | 0.815-0.903 |
| <i>Pseudomonas filiscindens</i>                          | 11                     | 0.824-0.883 |
| <i>psychrophilic marine bacterium</i> PS32               | 10                     | 0.808-0.949 |
| <i>Bacillus cereus</i>                                   | 9                      | 0.824-0.896 |
| <i>Prevotella melaninogenica</i> (T)                     | 9                      | 0.841-0.944 |
| <i>Parabacteroides goldsteinii</i>                       | 8                      | 0.804-0.910 |
| <i>Bacteroides massiliensis</i>                          | 8                      | 0.828-0.924 |
| uncultured <i>Moraxellaceae</i> bacterium                | 8                      | 0.834-0.948 |
| <i>Lactobacillus rhamnosus</i>                           | 8                      | 0.811-0.907 |
| <i>Capnocytophaga</i> sp.                                | 7                      | 0.911-0.946 |
| <i>Porphyromonas</i> sp. oral clone EP003                | 7                      | 0.857-0.923 |
| uncultured <i>Veillonella</i> sp.                        | 7                      | 0.801-0.939 |
| <i>Bacillus pumilus</i>                                  | 7                      | 0.816-0.909 |
| uncultured <i>Porphyromonas</i> sp.                      | 6                      | 0.917-0.929 |
| <i>Haemophilus parasuis</i> SH0165                       | 6                      | 0.808-0.935 |
| uncultured <i>Tsukamurella</i> sp.                       | 6                      | 0.810-0.923 |
| <i>Actinomyces naeslundii</i>                            | 6                      | 0.841-0.948 |
| <i>Veillonella parvula</i>                               | 6                      | 0.872-0.948 |
| <i>Fusobacterium nucleatum</i> (T)                       | 6                      | 0.817-0.934 |
| <i>Neisseria sicca</i>                                   | 6                      | 0.912-0.949 |

|                                                               |   |             |
|---------------------------------------------------------------|---|-------------|
| <i>Streptococcus sanguinis</i> SK36                           | 6 | 0.816-0.931 |
| <i>Actinomyces</i> sp.                                        | 5 | 0.885-0.939 |
| <i>Bacteroides stercoris</i> ATCC 43183                       | 5 | 0.833-0.895 |
| <i>Prevotella melaninogenica</i>                              | 5 | 0.853-0.947 |
| <i>Fusobacterium</i> sp. oral clone ASCF06                    | 5 | 0.83-0.933  |
| TM7 [G-1] sp.                                                 | 5 | 0.839-0.947 |
| uncultured <i>Actinomyces</i> sp.                             | 5 | 0.817-0.923 |
| uncultured <i>Prevotella</i> sp.                              | 5 | 0.830-0.910 |
| <i>Parabacteroides distasonis</i>                             | 4 | 0.838-0.922 |
| <i>Actinomyces odontolyticus</i>                              | 4 | 0.844-0.941 |
| uncultured <i>Corynebacterium</i> sp.                         | 4 | 0.933-0.944 |
| <i>Campylobacter gracilis</i>                                 | 4 | 0.803-0.914 |
| uncultured <i>Neisseria</i> sp.                               | 4 | 0.813-0.876 |
| <i>Moraxella catarrhalis</i>                                  | 4 | 0.872-0.917 |
| <i>Burkholderia glathei</i> (T)                               | 4 | 0.855-0.865 |
| <i>Corynebacterium</i> sp.                                    | 4 | 0.815-0.942 |
| <i>Terrahaemophilus aromaticivorans</i>                       | 4 | 0.929-0.942 |
| <i>Actinomyces</i> sp. oral strain Hal-1065                   | 3 | 0.836-0.844 |
| <i>Streptococcus mitis</i>                                    | 3 | 0.816-0.948 |
| <i>Bacteroides tectus</i>                                     | 3 | 0.871-0.921 |
| <i>Selenomonas</i> sp.                                        | 3 | 0.916-0.931 |
| <i>Fusobacterium nucleatum</i> ss. <i>nucleatum</i>           | 3 | 0.886-0.949 |
| <i>Aggregatibacter aphrophilus</i>                            | 3 | 0.863-0.897 |
| <i>Actinomyces</i> sp. oral clone IP073                       | 3 | 0.818-0.843 |
| <i>Leptotrichia</i> sp. oral clone HE012                      | 3 | 0.8-0.8897  |
| <i>Parabacteroides merdae</i>                                 | 3 | 0.880-0.918 |
| <i>Bacteroides coprocola</i>                                  | 3 | 0.867-0.886 |
| <i>Moraxella bovoculi</i> (T)                                 | 3 | 0.871-0.934 |
| <i>Bacteroides thetaiotaomicron</i>                           | 3 | 0.841-0.909 |
| uncultured candidate division TM7                             | 2 | 0.882-0.889 |
| <i>Haemophilus parainfluenzae</i>                             | 2 | 0.939-0.946 |
| <i>Eikenella corrodens</i>                                    | 2 | 0.867-0.876 |
| uncultured <i>Capnocytophaga</i> sp.                          | 2 | 0.932-0.944 |
| <i>Bacteroides intestinalis</i>                               | 2 | 0.805-0.904 |
| <i>Bifidobacterium adolescentis</i> (T)                       | 2 | 0.830-0.836 |
| <i>Bacteroides salyersiae</i>                                 | 2 | 0.839-0.887 |
| <i>Prevotella denticola</i>                                   | 2 | 0.910-0.948 |
| <i>Rehmannia glutinosa</i> var. <i>purpurea</i> ' phytoplasma | 2 | 0.801-0.830 |
| <i>Moraxella</i> sp.                                          | 2 | 0.916-0.933 |
| <i>Acetobacter pasteurianus</i> IFO 3283-07                   | 2 | 0.805-0.807 |
| <i>Streptococcus anginosus</i>                                | 2 | 0.876-0.944 |
| uncultured <i>Abiotrophia</i> sp.                             | 2 | 0.849-0.912 |
| <i>Actinomyces israelii</i>                                   | 2 | 0.942-0.944 |
| uncultured <i>Megasphaera</i> sp.                             | 2 | 0.830-0.874 |
| <i>Xanthomonas translucens</i> pv. <i>poae</i>                | 2 | 0.822-0.834 |
| <i>Terrahaemophilus</i> sp.                                   | 2 | 0.914-0.915 |

|                                                        |   |             |
|--------------------------------------------------------|---|-------------|
| <i>Bacteroides caccae</i>                              | 2 | 0.919-0.937 |
| <i>Aggregatibacter</i> sp.                             | 2 | 0.874-0.934 |
| <i>Prevotella salivae</i> (T)                          | 2 | 0.830-0.929 |
| <i>Actinomyces</i> sp. oral taxon 180                  | 2 | 0.830-0.944 |
| <i>Selenomonas sputigena</i>                           | 2 | 0.817-0.854 |
| <i>Veillonella dispar</i>                              | 2 | 0.947-0.949 |
| uncultured <i>Selenomonas</i> sp.                      | 2 | 0.803-0.891 |
| <i>Actinomyces oris</i>                                | 2 | 0.880-0.889 |
| <i>Fusobacterium nucleatum</i> ss. <i>vincentii</i>    | 2 | 0.896-0.942 |
| <i>Clostridium difficile</i> 630                       | 2 | 0.803-0.845 |
| <i>Pectobacterium atrosepticum</i>                     | 2 | 0.887-0.91  |
| <i>Prevotella denticola</i> (T)                        | 2 | 0.831-0.947 |
| <i>Selenomonas</i> sp. oral clone GT010                | 2 | 0.931-0.939 |
| <i>Kingella oralis</i> (T)                             | 2 | 0.808-0.934 |
| <i>Parascardovia denticolens</i>                       | 2 | 0.834-0.910 |
| <i>Neisseria elongata</i> (T)                          | 2 | 0.807-0.903 |
| <i>Selenomonas infelix</i> (T)                         | 2 | 0.895-0.897 |
| <i>Rothia dentiocariosa</i>                            | 2 | 0.895-0.900 |
| <i>Actinomyces</i> sp. oral clone IO076                | 2 | 0.907-0.918 |
| <i>Bacteroides uniformis</i>                           | 1 | 0.81        |
| <i>Capnocytophaga granulosa</i>                        | 1 | 0.8         |
| <i>Rothia</i> sp. oral taxon 188                       | 1 | 0.95        |
| <i>Prevotella</i> sp. oral clone GI032                 | 1 | 0.82        |
| <i>Haemophilus</i> sp.                                 | 1 | 0.95        |
| <i>Actinomyces israelii</i> (T)                        | 1 | 0.95        |
| uncultured <i>Gemella</i> sp.                          | 1 | 0.81        |
| uncultured <i>Pseudanabaena</i> sp.                    | 1 | 0.9         |
| <i>Gemella</i> sp. oral clone ASCE02                   | 1 | 0.85        |
| <i>Prevotella tannerae</i>                             | 1 | 0.92        |
| <i>Bacteroides acidifaciens</i>                        | 1 | 0.92        |
| <i>Campylobacter concisus</i>                          | 1 | 0.85        |
| <i>Bergeyella</i> sp.                                  | 1 | 0.94        |
| <i>Lactobacillus paracasei</i> subsp. <i>paracasei</i> | 1 | 0.82        |
| <i>Streptococcus</i> sp. oral clone ASCG04             | 1 | 0.86        |
| <i>Streptococcus</i> sp. oral clone ASCA03             | 1 | 0.83        |
| <i>Capnocytophaga</i> sp. oral clone BR085             | 1 | 0.82        |
| <i>Lachnospiraceae</i> [G-4] sp.                       | 1 | 0.94        |
| <i>Streptococcus suis</i> BM407                        | 1 | 0.9         |
| <i>Neisseria gonorrhoeae</i>                           | 1 | 0.95        |
| <i>Micrococcus luteus</i> NCTC 2665                    | 1 | 0.95        |
| <i>Olsenella uli</i>                                   | 1 | 0.94        |
| <i>Pseudomonas aeruginosa</i>                          | 1 | 0.86        |
| <i>Atopobium parvulum</i> DSM 20469                    | 1 | 0.85        |
| <i>Prevotella</i> sp. oral clone BE073                 | 1 | 0.8         |
| <i>Capnocytophaga</i> sp. AHN9756                      | 1 | 0.94        |
| <i>Prevotella intermedia</i>                           | 1 | 0.91        |

|                                                   |   |      |
|---------------------------------------------------|---|------|
| <i>Leptotrichia sp. oral clone IK040</i>          | 1 | 0.93 |
| <i>Aster yellows phytoplasma B</i>                | 1 | 0.82 |
| <i>Kytococcus sedentarius</i>                     | 1 | 0.81 |
| <i>Kordia algicida (T)</i>                        | 1 | 0.9  |
| <i>Tannerella forsythensis</i>                    | 1 | 0.92 |
| <i>Rothia sp.</i>                                 | 1 | 0.81 |
| <i>Xanthomonas axonopodis pv. citrumelo</i>       | 1 | 0.81 |
| <i>Capnocytophaga sp. AHN9687</i>                 | 1 | 0.94 |
| <i>Neisseria pharyngis</i>                        | 1 | 0.92 |
| <i>Streptococcus gordonii</i>                     | 1 | 0.93 |
| <i>Eubacterium sp. oral clone DO016</i>           | 1 | 0.91 |
| <i>Porphyromonas sp. oral clone DP023</i>         | 1 | 0.95 |
| <i>Streptococcus sp. Culture clone SRC DSC22</i>  | 1 | 0.89 |
| <i>Actinomyces oricola</i>                        | 1 | 0.93 |
| <i>Chryseobacterium sp. IMMIB L-1519</i>          | 1 | 0.85 |
| <i>Xanthomonas axonopodis pv. syngonii</i>        | 1 | 0.85 |
| <i>Streptococcus mitis B6</i>                     | 1 | 0.93 |
| <i>Prevotella oralis</i>                          | 1 | 0.81 |
| <i>Burkholderia sp. m35b</i>                      | 1 | 0.94 |
| <i>TM7 [G-3] sp.</i>                              | 1 | 0.87 |
| <i>Rothia dentocariosa (T)</i>                    | 1 | 0.92 |
| <i>Bacteroides-like sp. oral clone AU126</i>      | 1 | 0.86 |
| <i>Neisseria sp.</i>                              | 1 | 0.86 |
| <i>Lautropia mirabilis</i>                        | 1 | 0.89 |
| <i>Fusobacterium nucleatum ss. animalis</i>       | 1 | 0.89 |
| <i>Lachnospiraceae bacterium 'Oral Taxon 107'</i> | 1 | 0.9  |
| uncultured eubacterium                            | 1 | 0.92 |
| uncultured candidate division SR1 bacterium       | 1 | 0.85 |
| <i>Clostridiales bacterium CD3:22</i>             | 1 | 0.84 |
| <i>Eubacterium [XIVa][G-1] saburreum</i>          | 1 | 0.94 |
| <i>Treponema pectinovorum</i>                     | 1 | 0.86 |
| <i>Fusobacterium nucleatum ss. polymorphum</i>    | 1 | 0.87 |
| uncultured gamma proteobacterium                  | 1 | 0.81 |
| <i>Bacteroides pyogenes</i>                       | 1 | 0.89 |
| <i>Prevotella sp. oral clone GU027</i>            | 1 | 0.9  |
| <i>Leptotrichia sp.</i>                           | 1 | 0.8  |
| <i>Bacteroides fragilis</i>                       | 1 | 0.87 |
| <i>Neisseria flava</i>                            | 1 | 0.94 |
| <i>Solobacterium moorei</i>                       | 1 | 0.92 |
| <i>Capnocytophaga gingivalis</i>                  | 1 | 0.83 |
| uncultured <i>Haemophilus sp.</i>                 | 1 | 0.95 |
| <i>Kingella oralis</i>                            | 1 | 0.93 |
| <i>Fusobacterium sp. oral clone CZ006</i>         | 1 | 0.93 |
| <i>Veillonellaceae bacterium oral taxon 155</i>   | 1 | 0.83 |
| <i>Granulicatella sp. oral clone ASCG05</i>       | 1 | 0.85 |
| <i>Leptotrichia sp. oral clone DR011</i>          | 1 | 0.89 |

|                                                        |   |      |
|--------------------------------------------------------|---|------|
| <i>Capnocytophaga ochracea</i>                         | 1 | 0.91 |
| uncultured <i>Bacteroidetes bacterium</i>              | 1 | 0.92 |
| <i>Eubacterium saburreum</i>                           | 1 | 0.94 |
| <i>Micrococcus luteus</i>                              | 1 | 0.83 |
| <i>Catonella morbi</i>                                 | 1 | 0.83 |
| <i>Streptococcus gordonii</i> str. Challis substr. CHI | 1 | 0.82 |
| <i>Actinomyces orihominis</i>                          | 1 | 0.95 |
| <i>Veillonella atypica</i>                             | 1 | 0.95 |
| <i>Haemophilus influenzae</i>                          | 1 | 0.9  |
| <i>Lactobacillus vaginalis</i>                         | 1 | 0.83 |
| <i>Neisseria</i> sp. oral clone AP015                  | 1 | 0.93 |
| <i>Capnocytophaga</i> sp. AHN8725                      | 1 | 0.91 |

---

**Supplementary Table 4** | Bacterial diversity in cavities from samples CA06-1.6 (a) and CA05-4.6 (b). Data show the number of contigs >500 bp giving a significant hit in the NR database (score >100).

**a**

| BLAST hit against NRdb                | Class            | Contigs >500 bp |
|---------------------------------------|------------------|-----------------|
| <i>Veillonella parvula</i>            | Clostridia       | 166             |
| <i>Streptococcus pneumoniae</i>       | Bacilli          | 59              |
| <i>Streptococcus mitis</i>            | Bacilli          | 35              |
| <i>Capnocytophaga ochracea</i>        | Flavobacteria    | 20              |
| <i>Prevotella ruminicola</i>          | Bacteroidia      | 15              |
| <i>Porphyromonas gingivalis</i>       | Bacteroidia      | 10              |
| <i>Streptococcus gordonii</i>         | Bacilli          | 9               |
| <i>Corynebacterium aurimucosum</i>    | Actinobacteria   | 7               |
| <i>Corynebacterium efficiens</i>      | Actinobacteria   | 7               |
| <i>Fusobacterium nucleatum</i>        | Fusobacterium    | 7               |
| <i>Bacteroides fragilis</i>           | Bacteroides      | 6               |
| <i>Alistipes shahii</i>               | Bacteroides      | 5               |
| <i>Corynebacterium diphtheriae</i>    | Actinobacteria   | 5               |
| <i>Leptotrichia buccalis</i>          | Fusobacteria     | 5               |
| <i>Xylanimonas cellulosilytica</i>    | Actinobacteria   | 5               |
| <i>Aggregatibacter aphrophilus</i>    | γ-proteobacteria | 4               |
| <i>Bacteroides thetaiotaomicron</i>   | Bacteroides      | 4               |
| <i>Corynebacterium glutamicum</i>     | Actinobacterium  | 4               |
| <i>Slackia heliotrinireducens</i>     | Actinobacteria   | 4               |
| <i>Bacteroides fragilis</i>           | Bacteroides      | 3               |
| <i>Campylobacter concisus</i>         | ε-proteobacteria | 3               |
| <i>Corynebacterium kroppenstedtii</i> | Actinobacteria   | 3               |
| <i>Streptococcus oralis</i>           | Bacilli          | 3               |
| <i>Bacteriophage Dp-1</i>             | Virus            | 2               |
| <i>Bacteroides vulgatus</i>           | Bacteroides      | 2               |
| <i>Beutenbergia cavernae</i>          | Actinobacteria   | 2               |
| <i>Campylobacter hominis</i>          | ε-proteobacteria | 2               |
| <i>Conexibacter woesei</i>            | Actinobacteria   | 2               |
| <i>Corynebacterium jeikeium</i>       | Actinobacteria   | 2               |
| <i>Corynebacterium urealyticum</i>    | Actinobacteria   | 2               |
| <i>Kribbella flavida</i>              | Actinobacteria   | 2               |
| <i>Micrococcus luteus</i>             | Actinobacteria   | 2               |
| <i>Mycobacterium gilvum</i>           | Actinobacteria   | 2               |
| <i>Prevotella intermedia</i>          | Bacteroidia      | 2               |
| <i>Rhodopseudomonas palustris</i>     | α-proteobacteria | 2               |

**b**

| BLAST hit against NRdb               | Class            | Contigs >500 bp |
|--------------------------------------|------------------|-----------------|
| <i>Veillonella parvula</i>           | Clostridia       | 135             |
| <i>Xylanimonas cellulosilytica</i>   | Actinobacteria   | 46              |
| <i>Sanguibacter keddieii</i>         | Actinobacteria   | 30              |
| <i>Kineococcus radiotolerans</i>     | Actinobacteria   | 20              |
| <i>Porphyromonas gingivalis</i>      | Bacteroidia      | 19              |
| <i>Beutenbergia cavernae</i>         | Actinobacteria   | 17              |
| <i>Treponema denticola</i>           | Spirochaetes     | 17              |
| <i>Brachybacterium faecium</i>       | Actinobacteria   | 16              |
| <i>Kytococcus sedentarius</i>        | Actinobacteria   | 14              |
| <i>Actinomyces naeslundii</i>        | Actinobacteria   | 11              |
| <i>Kocuria rhizophila</i>            | Actinobacteria   | 10              |
| <i>Catenulispora acidiphila</i>      | Actinobacteria   | 9               |
| <i>Geodermatophilus obscurus</i>     | Actinobacteria   | 9               |
| <i>Micrococcus luteus</i>            | Actinobacteria   | 9               |
| <i>Nocardioides sp.</i>              | Actinobacteria   | 9               |
| <i>Thermomonospora curvata</i>       | Actinobacteria   | 9               |
| <i>Rothia mucilaginoso</i>           | Actinobacteria   | 8               |
| <i>Neisseria meningitidis</i>        | β-proteobacteria | 7               |
| <i>Streptomyces coelicolor</i>       | Actinobacteria   | 6               |
| <i>Actinosynnema mirum</i>           | Actinobacteria   | 5               |
| <i>Arthrobacter chlorophenolicus</i> | Actinobacteria   | 5               |
| <i>Clavibacter michiganensis</i>     | Actinobacteria   | 5               |
| <i>Corynebacterium efficiens</i>     | Actinobacteria   | 5               |
| <i>Nakamurella multipartita</i>      | Actinobacteria   | 5               |
| <i>Streptococcus sanguinis</i>       | Bacilli          | 5               |
| <i>Streptomyces avermitilis</i>      | Actinobacteria   | 5               |
| <i>Streptomyces griseus</i>          | Actinobacteria   | 5               |
| <i>Bifidobacterium longum</i>        | Actinobacteria   | 4               |
| <i>Nocardia farcinica</i>            | Actinobacteria   | 4               |
| <i>Propionibacterium acnes</i>       | Actinobacteria   | 4               |
| <i>Actinomyces oris</i>              | Actinobacteria   | 3               |
| <i>Bifidobacterium adolescentis</i>  | Actinobacteria   | 3               |
| <i>Gordonia bronchialis</i>          | Actinobacteria   | 3               |
| <i>Saccharopolyspora erythraea</i>   | Actinobacteria   | 3               |
| <i>Streptococcus gordonii</i>        | Bacilli          | 3               |
| <i>Streptomyces scabiei</i>          | Actinobacteria   | 3               |
| <i>Alistipes shahii</i>              | Bacteroides      | 2               |
| <i>Arthrobacter sp.</i>              | Actinobacteria   | 2               |
| <i>Corynebacterium aurimucosum</i>   | Actinobacteria   | 2               |
| <i>Corynebacterium diphtheriae</i>   | Actinobacteria   | 2               |
| <i>Corynebacterium urealyticum</i>   | Actinobacteria   | 2               |
| <i>Eggerthella lenta</i>             | Actinobacteria   | 2               |
| <i>Leifsonia xyli</i>                | Actinobacteria   | 2               |
| <i>Leptotrichia buccalis</i>         | Fusobacteria     | 2               |
| <i>Mycobacterium avium</i>           | Actinobacteria   | 2               |
| <i>Rhodococcus opacus</i>            | Actinobacteria   | 2               |
| <i>Stackebrandtia nassauensis</i>    | Actinobacteria   | 2               |
| <i>Streptosporangium roseum</i>      | Actinobacteria   | 2               |
| <i>Thermobifida fusca</i>            | Actinobacteria   | 2               |
